# Supplementary material for: Intravital Imaging of a Massive Lymphocyte Response in the Cortical Dura of Mice after Peripheral Infection by Trypanosomes
Source: PubMed Central journal article supplement (PMC4400075; doi:10.1371/journal.pntd.0003714), 2015-04-16

**A**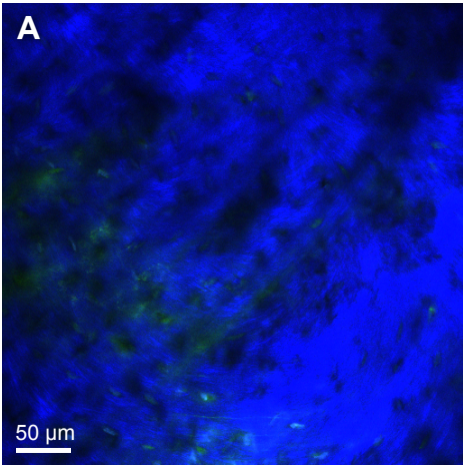**B**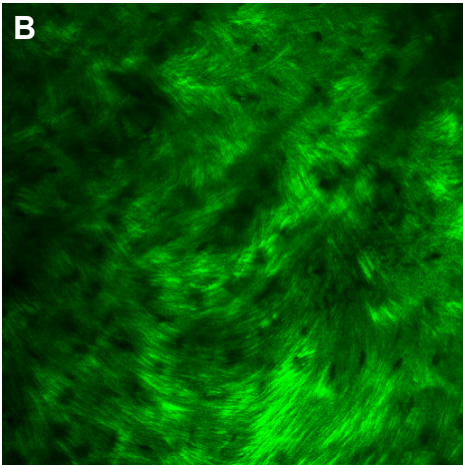

Supplement: pntd.0003714.s003.pdf [file pntd.0003714.s003.pdf]
