# Supplementary material for: Intravital Imaging of a Massive Lymphocyte Response in the Cortical Dura of Mice after Peripheral Infection by Trypanosomes
Source: PubMed Central journal article supplement (PMC4400075; doi:10.1371/journal.pntd.0003714), 2015-04-16
Supplement: pntd.0003714.s004.pdf [file pntd.0003714.s004.pdf]

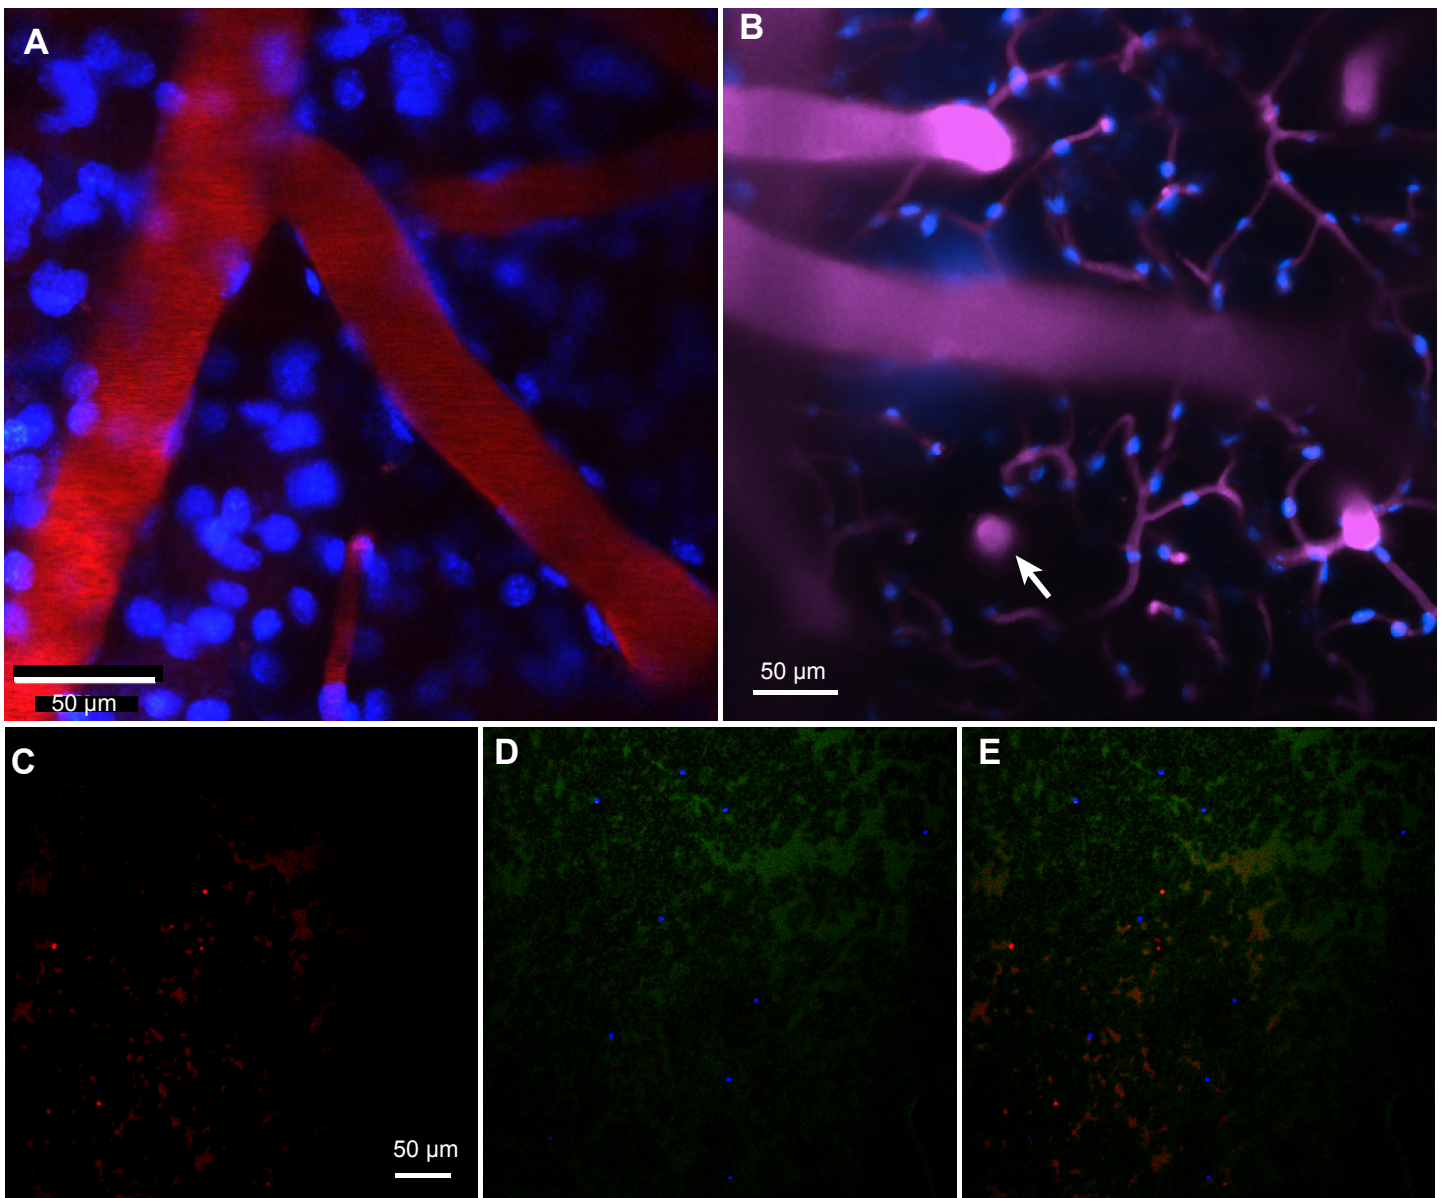

**S4 Figure.** Labeling of host cells by intravenous furamidine. **A,B.** Two-photon imaging through the thinned skull. **A.** Blue fluorescence from the nuclei of dural cells and of endothelial cells of pial vessels. **B.** A Z-projection 100  $\mu\text{m}$  deep extending from large horizontal pial vessels into the parenchyma with its vertical vessels (arrow) and sinuous capillaries. Nuclei of vascular endothelial cells are labeled. **C-D.** A blood smear from a reporter mouse expressing DsRed in  $\text{CD2}^+$  T lymphocytes. **C.** DsRed. **D.** Furamidine. **E.** Merged image showing that unidentified leukocytes that are not T lymphocytes are labeled by furamidine.
